# Supplementary material
Source: publisher figshare collection journal article supplement (https://wiley.figshare.com/articles/dataset/_/3547071)
Supplement: Supplementary file 1 [file 1 › appendix-A.htm]

Ecological Archives E091-106-A1


### *Ecological Archives* E091-106-A1

### **Orr Spiegel and Ran Nathan. Year. Incorporating density dependence into the directed dispersal hypothesis. *Ecology* VOL:pp–pp.**

Appendix A. Analytical model for the directed-dispersal (DrD) paradox (a linear version).

> View / download PDF.

---


[Back to E091-106]
